# Supplementary material for: Determinants of effective heart failure self-care: a systematic review of patients’ and caregivers’ perceptions
Source: HighWire-hosted journal article supplement (doi:10.1136/heartjnl-2013-304852), 2014-02-18
Supplement: heartjnl-2013-304852supp.pdf [file heartjnl-2013-304852supp.pdf]

**Supplementary Table 1. Quality Appraisal and Methodological Descriptions of Included Studies (n=49)**

| Author<br>(Study<br>Setting) | Quality<br>Rank<br>L/M/H | Main Strengths (+) and Weaknesses (-)                                                                                                                                                                                                                                        | Method/s | Sampling<br>Strategy      | Sample<br>Pt, HP, Cg<br>(Male/Female) | Mean<br>Age<br>and/or<br>Range<br>(sex) |
|------------------------------|--------------------------|------------------------------------------------------------------------------------------------------------------------------------------------------------------------------------------------------------------------------------------------------------------------------|----------|---------------------------|---------------------------------------|-----------------------------------------|
| Bennett [71]<br>(USA)        | M                        | + Congruity between research methodology, data analysis, and interpretation of results; detailed description of analysis procedures<br>- Did not provide sufficient sample characteristics (NYHA class, age range); difficult to assess the generalizability of the analyses | FG       | Convenience               | 23 Pt (16/7)<br>18 Cg (17/1)          | 60 Pt<br>only                           |
| Boren [57]<br>(USA)          | H                        | + Congruity between research methodology and interpretation of results; strong grounded theory approach<br>- Discusses data collected in the study data but also data collected within the author's nurse practice                                                           | SSI      | Convenience               | 15 Pt (0/15)                          | 28-76                                   |
| Buetow [50]<br>(New Zealand) | L                        | + Data analysis procedures are well-described; large sample size<br>- Difficult to generalize results; lacks description of sample and rationale for sampling strategy                                                                                                       | SSI      | Convenience               | 62 Pt (NR)                            | NR                                      |
| Clark [72]<br>(UK)           | M                        | + Congruity between the research questions and research design; study participants are adequately represented; quote identifiers are used<br>- Limited information on data analysis, researcher position, caregiver demographics                                             | SSI      | Convenience;<br>purposive | 50 Pt (33/17)<br>30 Cg (NR)           | 68 (F); 67<br>(M)<br>Pt only            |
| Clark [19]<br>(UK)           | H                        | + Congruity between the research questions and research design; representative use of quotes as quote identifiers are used<br>- Focus is on the description of patients although caregivers are focus of the study                                                           | SSI      | Convenience               | 30 Cg (7/23)<br>50 Pt (33/17)         | 68 (F); 67<br>(M)                       |
| Clark [37]<br>(Canada)       | H                        | + Congruity between research methodology and methods; participants are adequately represented<br>- Age of caregivers in sample is not clear                                                                                                                                  | SSI      | Convenience;<br>quota     | 42 Pt (27/15)<br>30 Cg (NR)           | 76 Pt<br>only                           |
| Costello [35]<br>(Canada)    | M                        | +Congruity between research methods and data collection procedures; analysis done by two researchers<br>- Small sample size; analysis and interpretation of results                                                                                                          | SSI      | Purposive                 | 6 Pt (3/3)<br>6 Cg (NR)               | 30-73                                   |

|                        |   |                                                                                                                                                                                                                                                         |                |                                           |                          |               |
|------------------------|---|---------------------------------------------------------------------------------------------------------------------------------------------------------------------------------------------------------------------------------------------------------|----------------|-------------------------------------------|--------------------------|---------------|
|                        |   | appear superficial                                                                                                                                                                                                                                      |                |                                           |                          |               |
| Dickson [49]<br>(NR)   | M | + Congruity between conceptual basis for study, research methodology, theoretical framework and interview methods<br>- Sample may be too small to draw conclusions about typology; analysis procedures described but not illustrated                    | SSI            | Purposive for NYHA II or III, younger age | 41 Pt (26/15)            | 25-65         |
| Dickson [29]<br>(NR)   | M | +Clear conceptual basis for study; integration of qualitative and quantitative findings<br>- Small sample size limits strength of quantitative evidence; sample predominantly white, male                                                               | SSI;<br>survey | Purposive                                 | 41 Pt (26/15)            | 49<br>25-65   |
| Dickson [40]<br>(USA)  | H | +Congruity between research methodology and interpretation of results; detailed description analysis procedures and data triangulation through mixed-methods design<br>- Sample is likely too small to generalize quantitative results                  | SSI;<br>survey | Purposive                                 | 41 Pt (26/15)            | 49<br>25-65   |
| Dickson [62]<br>(USA)  | M | +Congruity between research methodology and methods; detailed description of data integration and triangulation; use of a theory-driven interview guide<br>- Lack of researcher reflexivity; very few sample interview questions provided               | SSI;<br>survey | Purposive                                 | 30 Pt (18/12)            | 59.6<br>26-98 |
| Falk [70]<br>(Sweden)  | M | +Clear description of data analysis; provides sample data for all main categories<br>- Interview questions not provided; illustrative quotes are sometimes rather mundane                                                                               | SSI            | Purposive                                 | 17 Pt (12/5)             | 72<br>55-83   |
| Gary [53]<br>(USA)     | M | + Theoretical framework informs interview questions; provides quotes and frequency counts for each topic<br>- Interview guide may limit qualitative data generation; unclear how representative the data are of the sample                              | SSI            | Convenience                               | 32 Pt (0/32)             | 68            |
| Glassman [69]<br>(USA) | M | +Detailed systematic research approach; use of independent auditor to verify transcripts<br>- Small sample; quotes appear to draw from few participants; data seems repetitive                                                                          | UI             | Convenience;<br>purposive                 | 5 Pt (3/2)               | 77.2<br>60-85 |
| Granger [28]<br>(USA)  | M | +Congruity between theoretical framework and interview guide and approach to analysis; unique focus on patient-physician dyads<br>- Findings appear to be congruent with data collection and analysis, yet there is little patient data to substantiate | SSI            | Purposive                                 | 6 Pt (5/1)<br>6 HP (3/3) | 58 Pt<br>only |

|                                   |   | results                                                                                                                                                                                                                                                                                                           |                                  |                                       |                                                |                    |
|-----------------------------------|---|-------------------------------------------------------------------------------------------------------------------------------------------------------------------------------------------------------------------------------------------------------------------------------------------------------------------|----------------------------------|---------------------------------------|------------------------------------------------|--------------------|
| Helleso [75]<br>(Norway)          | M | + Basic interpretive descriptive approach; rationale for data collection approach<br>- Sample not well described; quote identifiers not used; themes appear superficial                                                                                                                                           | SSI                              | Convenience                           | 14 Pt (6/8)                                    | 79.6<br>71-93      |
| Horowitz [38]<br>(USA)            | H | + Robust theoretical framework; rigorous sampling methods; detailed description of analysis and sample characteristics; recommendations and conclusions appear to flow from the interpretation of the data<br>- None identified                                                                                   | SSI                              | Purposive                             | 19 Pt (10/9)                                   | 52-89              |
| Hoyt [73]<br>(USA)                | H | +Congruity between iterative research process and creative approach to analysis; patient demographics are well described<br>- Sampling appears to be convenience not purposive                                                                                                                                    | SSI                              | Convenience                           | 11 Pt (5/6)                                    | 67<br>50-81        |
| Jowsey [48]<br>(Australia)        | L | +Sample includes patients, caregivers, and health professionals; congruity in the interpretation of findings through a policy lens<br>- Insufficient information on participant age; not all of the findings are HF-specific, may affect transferability of findings                                              | SSI;<br>survey                   | Purposive for age, medical conditions | 52 Pt (28/24)<br>14 Cg (1/13)<br>63 HP (19/44) | NR                 |
| Jurgens [39]<br>(USA)             | L | +Congruity between methodology and mixed-methods used to collect data<br>- Participants are not adequately represented (limited qualitative data presented), small sample size limits generalizability of the quantitative data                                                                                   | SSI                              | Convenience                           | 77 Pt (40/37)                                  | 75.9               |
| Kaholokula [51]<br>(USA)          | L | + Focus on ethnic minority groups living with HF; rationale for use of theoretical model<br>- Findings/discussion does not adequately represent caregiver participants; does not adequately describe sample (NYHA class, age range), research questions not stated; does not report ethical approval of the study | FG                               | Convenience                           | 11 Pt (5/6)<br>25 Cg (4/21)                    | 65.9 Pt<br>50.5 Cg |
| Lough [47]<br>(NR)                | M | +Congruity between the methodology and data analysis; novel conceptualization of HF self-care as work<br>- Researcher position not stated                                                                                                                                                                         | SSI                              | Purposive                             | 25 Pt (12/13)                                  | 71<br>66-91        |
| Macabasco-O'Connell [32]<br>(USA) | L | +Focus on under-served population (low income patients)<br>- Lacks discussion on the approach to integrating results of the mixed-methods approach; participants do not appear to be adequately represented (insufficient use of                                                                                  | Structured interviews;<br>survey | Convenience                           | 65 Pt (29/36)                                  | 59                 |

|                                |   |                                                                                                                                                                                                                                                                                    |                           |                           |                                           |                          |
|--------------------------------|---|------------------------------------------------------------------------------------------------------------------------------------------------------------------------------------------------------------------------------------------------------------------------------------|---------------------------|---------------------------|-------------------------------------------|--------------------------|
|                                |   | quotes from participants)                                                                                                                                                                                                                                                          |                           |                           |                                           |                          |
| Mahoney [42]<br>(USA)          | M | +Congruity between methods and analysis of data;<br>participants selected from multiple sites; use of a pilot study;<br>- Conclusions appear somewhat simplistic                                                                                                                   | SSI                       | Purposive                 | 16 Pt (12/4)<br>12 Cg (NR)                | 67.7 Pt only             |
| Mead [34]<br>(USA)             | M | +Congruity between research questions and data collection methods; very large sample size; patients recruited from multiple sites; participants are adequately represented in the data through illustrative quotes<br>- Lack of age or sex-based descriptive analysis              | FG                        | Convenience;<br>purposive | 387 Pt (84/198:<br>105 sex not described) | 41% ≥ 65                 |
| Meyerson [31]<br>(USA)         | M | +Research design and overall study is well described<br>-Conclusions/findings are based on anecdotal records written during an HF self-care intervention; the study would likely be more rigorous if interviews had been conducted with patients to triangulate the case note data | Written anecdotal records | Convenience               | 27 Pt (NR)                                | 75                       |
| Ming [65]<br>(Malaysia)        | M | +Sufficient description of sample; patients appear to be adequately represented (via use of supporting quotes from participants)<br>-Theoretical basis not described; the interview guide or sample interview questions are not provided                                           | SSI                       | Purposive                 | 20 Pt (15/5)                              | 56.5<br>27-75            |
| Reid [67]<br>(UK)              | H | +Congruity between the research methodology and data collection methods; large sample size<br>-Patients recruited from outpatient HF clinics (these patients may already be receiving support for medication management)                                                           | SSI                       | Convenience               | 50 Pt (33/17)<br>29 Cg                    | 67.1<br>41-80<br>Pt only |
| Rerkluenrit [33]<br>(Thailand) | M | +Congruity between grounded theory approach and data collection and analysis methods; participants are adequately represented; good use of illustrative quotes<br>-Despite use of grounded theory approach authors do not identify a core variable                                 | SSI                       | Purposive;<br>theoretical | 35 Pt (19/16)                             | NR                       |
| Riegel [54]<br>(USA)           | M | +Basic interpretive descriptive design and approach to analysis<br>-Unsure about rigour of qualitative design; minimal description or interpretation of quotes provided for themes                                                                                                 | Structured interviews; FG | Convenience               | 26 Pt (17/9)                              | 74.4<br>59-91            |
| Riegel [55]<br>(USA)           | H | +Congruity between mixed-methods approach and integration and interpretation of qualitative and quantitative data<br>-Results obtained during intervention sessions                                                                                                                | Face-to-face intervention | Convenience               | 15 Pt (6/9)                               | 59.7                     |

|                            |   |                                                                                                                                                                                                                                                                        |                       |             |                          |               |
|----------------------------|---|------------------------------------------------------------------------------------------------------------------------------------------------------------------------------------------------------------------------------------------------------------------------|-----------------------|-------------|--------------------------|---------------|
| Riegel [36]<br>(USA)       | H | + Congruent methodology, data analysis and interpretation of results; theory driven purposive sampling<br>- Lacks information on age and number of participants in NYHA class III or IV                                                                                | Structured interviews | Theoretical | 29 Pt (18/11)            | NR            |
| Riegel [46]<br>(Australia) | M | +Congruity in mixed-methods design and triangulation of qualitative and quantitative data<br>-Participants are not adequately represented in results (limited use of quotes)                                                                                           | SSI                   | Purposive   | 29 Pt (21/8)             | 68.7          |
| Riegel [56]<br>(Australia) | M | +Congruity in mixed-methods approach; detailed steps indicate rigorous design<br>-Low proportion of women in sample; qualitative themes appear to draw upon quantitative results                                                                                       | SSI                   | Purposive   | 27 Pt (19/8)             | 68.7<br>35-94 |
| Sanford [63]<br>(USA)      | M | +Participants were recruited from multiple sites; use of quote identifiers suggests that participants are adequately represented the results / findings<br>-Use of unstructured interviews                                                                             | UI                    | Convenience | 20 Cg (5/15)             | NR            |
| Schnell [66]<br>(Canada)   | L | +Inclusion of ethnic minority groups; data analysis and report of findings is theoretically guided<br>-The small convenience sample is inadequately described; interview guide not validated / piloted and appears superficial; coding/analysis appears to lack rigour | SSI                   | Convenience | 11 Pt (7/4)              | 64<br>43-79   |
| Scott [64]<br>(USA)        | M | +Congruity in research methods, questions, data analysis, and interpretation of results<br>-Study is more quantitative than qualitative; researcher position not stated                                                                                                | SSI                   | Convenience | 20 Pt (NR)<br>18 Cg (NR) | 71.3 Cg only  |
| Scotto [52]<br>(USA)       | L | +Congruity between research methods and research questions<br>-Analysis appears superficial; themes appear to reflect nursing theory, not data; purports to be phenomenology but the process followed is generic interpretive descriptive                              | SSI                   | Convenience | 14 Pt (9/5)              | 63<br>42-84   |
| Scotto [45]<br>(USA)       | H | +Congruity in methodological approach; clear conceptualization of self-care and sampling rationale<br>- None identified                                                                                                                                                | SSI                   | Convenience | 14 Pt (9/5)              | 63<br>42-84   |
| Seto [41]<br>(Canada)      | L | +Provides sample interview questions and detailed demographic characteristics of participants<br>-Interviews may lack depth given their very short duration; no details on qualitative data analysis; no details on triangulation of quantitative and qualitative data | Survey;<br>SSI        | Convenience | 94 Pt (74/20)            | 54.6          |

|                                   |   |                                                                                                                                                                                                                                        |                               |                                           |              |               |
|-----------------------------------|---|----------------------------------------------------------------------------------------------------------------------------------------------------------------------------------------------------------------------------------------|-------------------------------|-------------------------------------------|--------------|---------------|
| Sloan [30]<br>(USA)               | H | +Focus on cognitive impairment is unique; congruity between theoretical/philosophical perspectives and data analysis<br>- Sample is literate and socially supported, findings may not be representative of larger population           | SSI                           | Purposive                                 | 12 Pt (10/2) | 43-81         |
| Stromberg [74]<br>(Sweden)        | H | +Congruity between methodology and data collection methods<br>-Interview questions use sophisticated language which may not be understood by participants; superficial examples might have more complex interpretations                | SSI                           | Purposive                                 | 25 Pt (17/8) | 46-93         |
| Stull [43]<br>(USA)               | M | +Congruity between theoretical framework (interactionist perspective) and data analysis and interpretation<br>-Triangulation of data in analysis is not apparent                                                                       | SSI                           | Convenience                               | 21 Pt (17/4) | 61<br>29-79   |
| Thornton [61]<br>(USA)            | M | +Appears rigorous (peer debriefing, use of an audit trail), provides interview guide; researcher position and reflexivity apparent<br>-Unclear how participants were originally recruited in parent study                              | SSI                           | Convenience<br>(from parent study sample) | 7 Cg (0/7)   | 45<br>39-52   |
| van der Wal [44]<br>(Netherlands) | M | +Identifies specific, practical issues into supporting self-care<br>-The term 'compliance' is dated (addressed by authors), but may influence approaches to data collection and/or analysis; themes seem to overlap and are very broad | SSI                           | Purposive                                 | 15 Pt (9/6)  | 70<br>42-87   |
| Weierbach [59]<br>(USA)           | M | + Congruity in research methods, research questions, data analysis, and interpretation of results<br>-Discussion is brief and appears superficial                                                                                      | SSI;<br>Case note review      | Convenience                               | 20 Pt (9/11) | 74.6<br>65-90 |
| Wu [60]<br>(USA)                  | L | +Basic interpretive descriptive approach; participants are adequately represented in the results<br>-Interview guide is specific and directed; themes appear simplistic                                                                | SSI;<br>structured interviews | Convenience;<br>purposive                 | 16 Pt (9/7)  | 60.4<br>41-84 |
| Wu [68]<br>(USA)                  | M | +Clear description of sample and methods; conclusions appear to flow from the analysis / interpretation of data<br>-Limited description of setting and recruitment strategies; reliance on convenience sampling                        | SSI                           | Convenience                               | 16 Pt (9/7)  | 60.4<br>41-84 |
| Zambroski [58]<br>(USA)           | H | +Congruity in research methodology, methods, and data analysis; strong rationale for creative use of metaphor; participants are adequately represented; use of illustrative quotes to support themes; participants recruited from      | SSI                           | Purposive                                 | 11 Pt (5/6)  | 67            |

---

multiple sites  
- Several interview questions provided but entire  
interview guide not included

---

Cg = Caregiver; F = Female; FG = Focus Group; HP = Health Professional; M= Male; NR = Not Reported; Pt = Patient; SSI = Semi-Structured Interviews; UI = Unstructured Interviews
